# Supplementary material
Source: Research Square preprint supplement (doi:10.21203/rs.3.rs-9993475/v1)
Supplement: Supplementary file 1 [file 36d2d8a3dd9d6da63484b163.docx]

# Supplementary Table S1. Primer sets used mutation test

| Mutation test | Forward Primer | Reverse Primer |
| --- | --- | --- |
| *MED12* (for gDNA) | GCCCTTTCACCTTGTTCCTT | TGTCCCTATAAGTCTTCCCAACC |
| *MED12* (for cDNA) | CTTCGGGATCTTGAGCTACG | GATCTTGGCAGGATTGAAGC |
| *FH*  (for gDNA)_1 | TTTGTTTTTGTTGCCTCTGATTT | GGATTTTGCATCAAGAGCATC |
| *FH*  (for gDNA)_2 | TGCTGCTGCAATAGAAGTTCA | CCTGCCCAAGAGTAAGTGGA |
| *FH*  (for gDNA)_3 | GCTCTGGTTGAGCTCAGTGG | GGACCTAGTCAAGTTTTAGCTCCA |
| HMGA2 | AGAGTCCCTCTAAAGCAGCTCA | CAACTGCTGCTGAGGTAGAAATCG |
| GAPDH | CCCTTCATTGACCTCAACTACATG | TGGGATTTCCATTGATGACAAGC |

# Supplementary Table S2. List of primers used this study

| Gene | Forward Primer | Reverse Primer |
| --- | --- | --- |
| *ACTA2* | CAAGTGATCACCATCGGAAATG | GACTCCATCCCGATGAAGGA |
| *ESR1* | CCACCAACCAGTGCACCATT | GGTCTTTTCGTATCCCACCTTTC |
| *PSR* | CATTTGCACAAACCTGATGG | CATGGTGTACAAGGCCACTG |
| *NANOG* | CAAAGGCAAACAACCCACTT | TCTGCTGGAGGCTGAGGTAT |
| *POU5F1 (*OCT-4*)* | GTATTCAGCCAAACGACCATC | CTGGTTCGCTTTCTCTTTCG |
| *SOX2* | TACAGCATGATGCAGGACCA | CGAGCTGGTCATGGAGTTGTA |
| *CD34* | TCCCAAAAGACCCTGATTGC | CTCCACCGTTTTCCGTGTAA |
| *CD44* | CCAGAAGGAACAGTGGTTTGGC | ACTGTCCTCTGGGCTTGGTGTT |
| *ITCA2 (*CD49b*)* | TTGCGTGTGGACATCAGTCTGG | GCTGGTATTTGTCGGACATCTAG |
| *GAPDH* | CCCTTCATTGACCTCAACTACATG | TGGGATTTCCATTGATGACAAGC |
