# Supplementary material
Source: Research Square preprint supplement (doi:10.21203/rs.3.rs-9993475/v1)
Supplement: Supplementary file 2 [file 8fee4c8fe45060a6c3a899c4.docx]

**
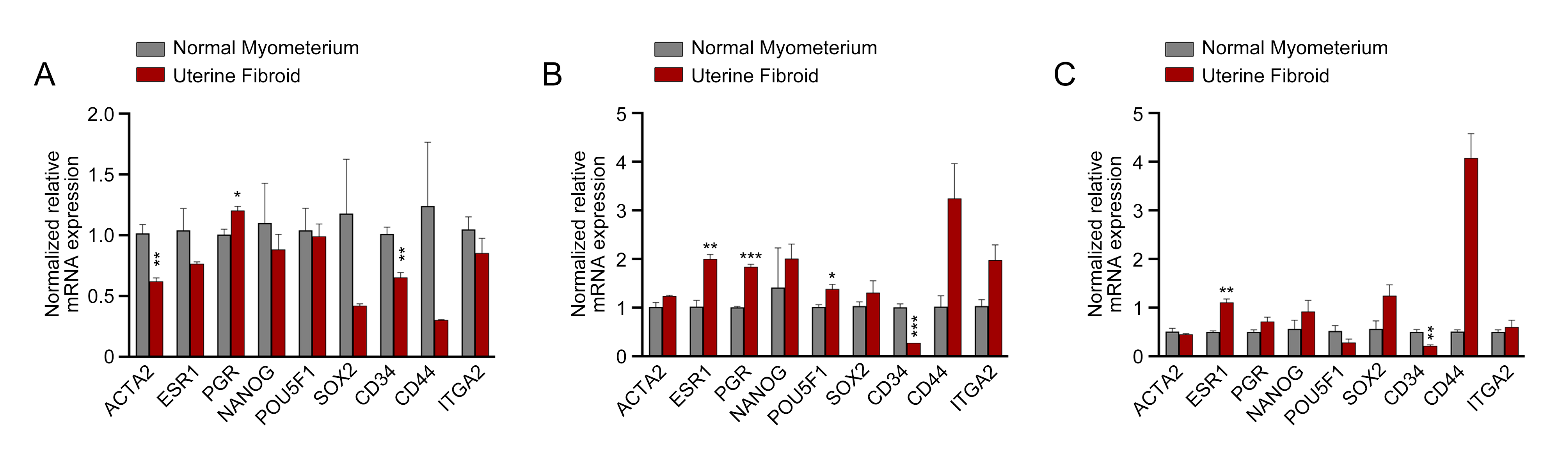
**

**Supplementary Figure 1. Patient-specific gene expression profiles in matched normal myometrium and uterine fibroid tissues.** Quantitative PCR (qPCR) analysis comparing the expression levels of smooth muscle–associated, hormone receptor–related, stemness-associated, and cell surface marker genes between paired normal myometrium (gray bars) and uterine fibroid tissues (red bars) obtained from individual patients. (A) Usual uterine fibroid sample UF-1. (B) Usual uterine fibroid sample UF-2. (C) STUMP sample. Relative mRNA expression levels were normalized to GAPDH and are presented relative to matched normal myometrium controls. Data are presented as mean ± SEM from three independent experiments (n = 3). *P < 0.05, **P < 0.01, and ***P < 0.001 were considered statistically significant.

**
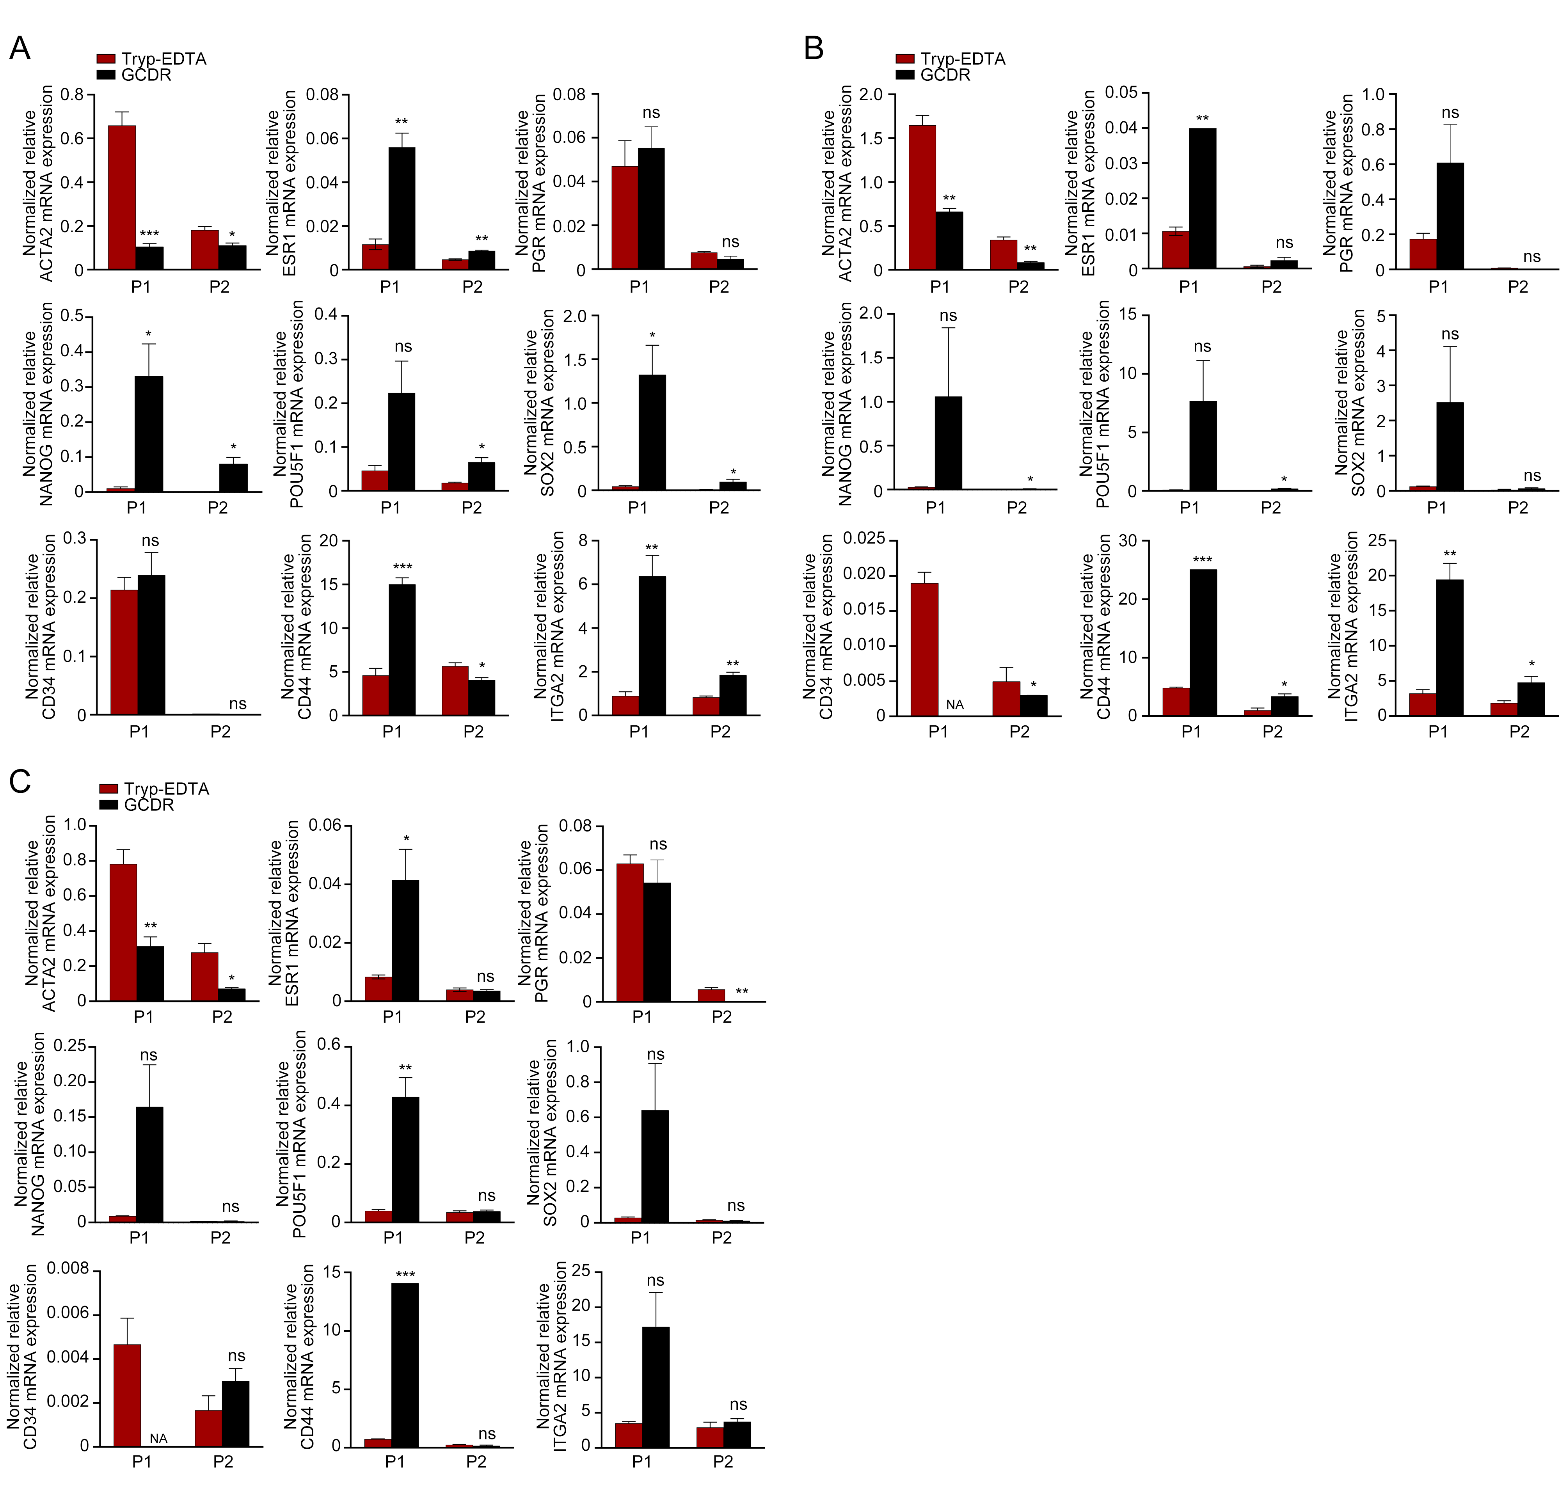
**

**Supplementary Figure 2. Patient-specific transcriptional changes during early adaptation of primary uterine leiomyoma cells to 2D culture under different passaging conditions.** Quantitative PCR (qPCR) analysis of leiomyoma-associated genes in primary cultures established under the E1 dissociation condition using either Tryp-EDTA (red bars) or GCDR (black bars) at passages 1 (P1) and 2 (P2). Expression levels are shown relative to matched UL tissue. (A) Usual uterine fibroid sample UF-1. (B) Usual uterine fibroid sample UF-2. (C) STUMP sample. Relative mRNA expression levels were normalized to GAPDH. Data are presented as mean ± SEM from three independent experiments (n = 3). *P < 0.05, **P < 0.01, and ***P < 0.001 were considered statistically significant. ns, non-significant; NA, not available.
